# Supplementary material for: Rapid detection of abrin in foods with an up-converting phosphor technology-based lateral flow assay
Source: PubMed Central journal article supplement (PMC5050493; doi:10.1038/srep34926), 2016-10-05
Supplement: srep34926-s1.pdf [file srep34926-s1.pdf]

## Supplementary Information

### Rapid detection of abrin in foods with an up-converting phosphor technology-based lateral flow assay

Xiao Liu<sup>1,2,3†</sup>, Yong Zhao<sup>2,3†</sup>, Chongyun Sun<sup>2,3,4</sup>, Xiaochen Wang<sup>2,3,5</sup>, Xinrui Wang<sup>2,3,6</sup>, Pingping Zhang<sup>2,3</sup>, Jingfu Qiu<sup>7\*</sup>, Ruifu Yang<sup>2,3\*</sup> & Lei Zhou<sup>2,3\*</sup>

<sup>1</sup>Chongqing Entry Exit Inspection and Quarantine Bureau, Chongqing 400020, P. R. China

<sup>2</sup>Laboratory of Analytical Microbiology, State Key Laboratory of Pathogen and Biosecurity, Beijing Institute of Microbiology and Epidemiology, Beijing 100071, P. R. China

<sup>3</sup>Beijing Key Laboratory of POCT for Bioemergency and Clinic, Beijing 100071, P. R. China

<sup>4</sup>Department of Clinical Laboratory, Chinese People's Liberation Army General Hospital, Beijing 100853, P. R. China

<sup>5</sup>College of Animal Science and Technology, Jilin Agricultural University, Changchun 130118, P. R. China

<sup>6</sup>Institute for Plague Prevention and Control of Hebei Province, Zhangjiakou 075000, P. R. China

<sup>7</sup>School of Public Health and Management, Chongqing Medical University, Chongqing 400016, P. R. China

† XL and YZ contributed equally to this work.

\*Corresponding authors:

Lei Zhou, Tel: +86-10-66948562; E-mail: ammszhoulei@aliyun.com

Ruifu Yang, Tel: +86-10-66948595; E-mail: ruifuyang@gmail.com

Jingfu Qiu, E-mail: jfqiu@126.com

**Supplementary Table S1. Quantities and titers of mAbs against abrin**

**prepared in this study.**

| <b>mAb</b>                                 | <b>1F8</b> | <b>2F8</b> | <b>5C5</b> | <b>6F4</b> | <b>7G6</b> | <b>8F4</b> | <b>9G12</b> | <b>10E11</b> | <b>10G2</b> |
|--------------------------------------------|------------|------------|------------|------------|------------|------------|-------------|--------------|-------------|
| <b>Quantities<br/>(mg mL<sup>-1</sup>)</b> | 10         | 8          | 18         | 10         | 13         | 18         | 8           | 7            | 11          |
| <b>Titers<br/>(ng mL<sup>-1</sup>)</b>     | 15.6       | 15.6       | 15.6       | 31.25      | 15.6       | 125        | 31.25       | 31.25        | 31.25       |

**Supplementary Table S2. Comparison of different mAb pairs for use in the double-antibody-sandwich-based abrin-UPT-LFA.**

| M-mAb        | Initial LODs for abrin (ng mL <sup>-1</sup> ) with different UCP-mAb conjugates |           |           |           |           |           |           |           |           |
|--------------|---------------------------------------------------------------------------------|-----------|-----------|-----------|-----------|-----------|-----------|-----------|-----------|
|              | 1F8                                                                             | 2F8       | 5C5       | 6F4       | 7G6       | 8F4       | 9G12      | 10E11     | 10G2      |
| <b>1F8</b>   | -                                                                               | F         | <b>10</b> | 100       | 100       | F         | 100       | <b>10</b> | 100       |
| <b>2F8</b>   | <b>10</b>                                                                       | -         | F         | 100       | F         | F         | <b>10</b> | F         | F         |
| <b>5C5</b>   | F                                                                               | 100       | -         | F         | <b>10</b> | <b>10</b> | F         | 100       | <b>10</b> |
| <b>6F4</b>   | F                                                                               | <b>10</b> | F         | -         | F         | F         | F         | 100       | <b>10</b> |
| <b>7G6</b>   | F                                                                               | <b>10</b> | <b>10</b> | 100       | -         | 100       | 100       | F         | F         |
| <b>8F4</b>   | 100                                                                             | F         | F         | F         | <b>10</b> | -         | F         | 100       | <b>10</b> |
| <b>9G12</b>  | F                                                                               | F         | F         | 100       | F         | F         | -         | F         | F         |
| <b>10E11</b> | <b>10</b>                                                                       | <b>10</b> | <b>10</b> | <b>10</b> | <b>10</b> | 100       | F         | -         | 100       |
| <b>10G2</b>  | F                                                                               | F         | 100       | 100       | <b>10</b> | 100       | F         | 100       | -         |

“-” means “not used to prepare the strip”. “F” means “failed to detect positive samples (10, 100 ng mL<sup>-1</sup>) in the assay”. The mAb pairs with lower initial LODs for abrin are shown in bold.
